# Supplementary material for: The in vitro effects of gibberellin on human sperm motility
Source: PubMed Central journal article supplement (PMC6555458; doi:10.18632/aging.101963), 2019-05-22
Supplement: aging-11-101963-s001.pdf [file aging-11-101963-s001.pdf]

## SUPPLEMENTARY TABLES

**Supplementary Table 1. Primary antibodies.**

| Antibody name  | Catalog no. | Molecular weight (kDa) | Source | Company   |
|----------------|-------------|------------------------|--------|-----------|
| SOD            | bs-10216R   | 17                     | Rabbit | Bioss     |
| CAT            | bs-6874R    | 60                     | Rabbit | Bioss     |
| GPX1           | bs-3882R    | 22                     | Rabbit | Bioss     |
| P53            | ab1431      | 53                     | Rabbit | Abcam     |
| BAX            | mAb #2772   | 21                     | Rabbit | CST       |
| ATP-5A         | bs-2435R    | 13                     | Rabbit | Bioss     |
| ATP-5B         | bs-8600R    | 51                     | Rabbit | Bioss     |
| AMPK           | bs-1115R    | 64                     | Rabbit | Bioss     |
| p-AMPK(Thr172) | bs-4002R    | 64                     | Rabbit | Bioss     |
| GAPDH          | YM3040      | 37                     | Mouse  | Immunoway |

**Supplementary Table 2. The sperm motility (grade A+B) following treatment with low concentrations of gibberellin for different times.**

| Concentration        | Time       |            |            |            |            |
|----------------------|------------|------------|------------|------------|------------|
|                      | 0h         | 1h         | 5h         | 9h         | 19h        |
| Control-0.5% ethanol | 71.60±1.65 | 71.99±1.86 | 69.10±2.31 | 63.53±1.89 | 58.19±2.65 |
| 0.01 mM              | 71.03±1.56 | 72.01±1.80 | 67.54±1.99 | 62.26±1.54 | 57.57±1.94 |
| 0.04 mM              | 71.63±2.51 | 71.49±2.76 | 68.12±2.66 | 63.19±2.42 | 59.30±2.93 |
| 0.08 mM              | 71.43±1.50 | 71.59±1.83 | 67.31±1.89 | 62.34±2.65 | 58.68±2.56 |
| P value              | 0.44       | 0.72       | 0.26       | 0.63       | 0.71       |

**Supplementary Table 3. The sperm motility (grade A+B) following treatment with high concentrations of gibberellin for different times.**

| Concentration        | Time       |                   |                   |                   |                   |
|----------------------|------------|-------------------|-------------------|-------------------|-------------------|
|                      | 0h         | 1h                | 5h                | 9h                | 19h               |
| Control- non-ethanol | 76.58±0.95 | 77.40±2.23        | 71.59±3.64        | 67.15±3.29        | 62.94±1.76        |
| Control-0.5% ethanol | 76.88±1.30 | 77.20±2.64        | 71.96±4.90        | 67.38±2.95        | 63.20±1.71        |
| 0.1 mM               | 76.13±1.23 | 73.62±3.41        | 67.39±4.94        | 61.85±5.72        | 56.41±5.98        |
| 0.2 mM               | 77.03±1.76 | 70.49±4.01        | 65.82±5.06        | 61.73±5.13        | 57.45±5.25        |
| 0.4 mM               | 77.30±1.53 | 68.08±4.08        | 63.93±4.06        | 58.78±6.09        | 53.73±2.70        |
| 0.8 mM               | 75.75±1.37 | 63.38±6.99        | 58.84±7.12        | 55.33±6.05        | 48.86±3.39        |
| Pvalue               | 0.6        | 0.00 <sup>a</sup> | 0.00 <sup>a</sup> | 0.00 <sup>a</sup> | 0.00 <sup>a</sup> |

<sup>a</sup> Significantly different from the Control-0.5% ethanol ( $P < 0.05$ )

**Supplementary Table 4. Na<sup>+</sup>/K<sup>+</sup>-ATPase and Ca<sup>2+</sup>-ATPase activity (U/mg protein).**

| ATPase                                  | Concentration        |           |           | P value            |
|-----------------------------------------|----------------------|-----------|-----------|--------------------|
|                                         | Control-0.5% ethanol | 0.2 mM    | 0.4 mM    |                    |
| Na <sup>+</sup> /K <sup>+</sup> -ATPase | 1.35±0.23            | 0.78±0.05 | 0.54±0.06 | 0.001 <sup>a</sup> |
| Ca <sup>2+</sup> -ATPase                | 1.54±0.46            | 0.99±0.14 | 0.65±0.26 | 0.038 <sup>a</sup> |

<sup>a</sup> Significantly different from the Control-0.5% ethanol ( $P < 0.05$ )
