# Supplementary material for: The in vitro effects of gibberellin on human sperm motility
Source: PubMed Central journal article supplement (PMC6555458; doi:10.18632/aging.101963), 2019-05-22
Supplement: aging-11-101963-s002.pdf [file aging-11-101963-s002.pdf]

**SUPPLEMENTARY FIGURE**

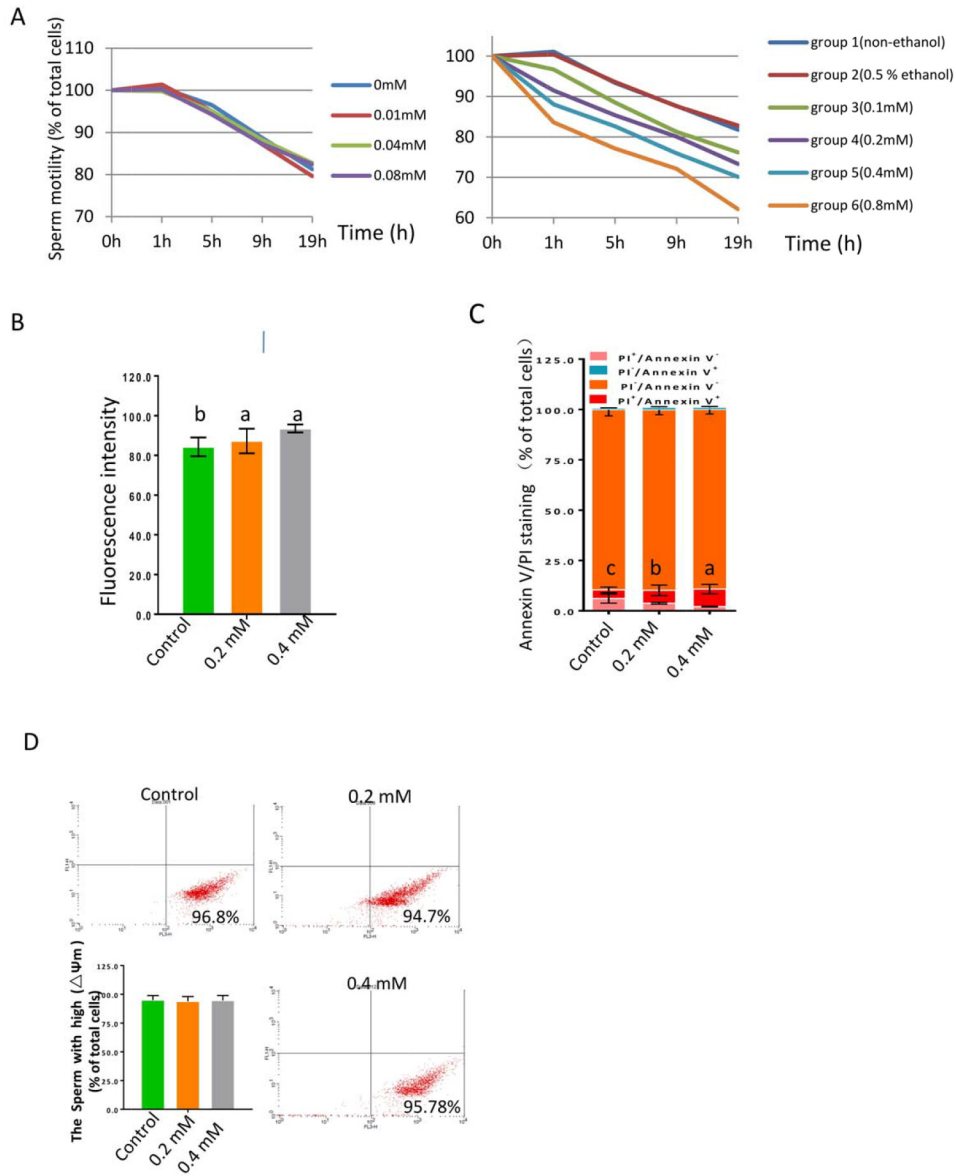

**Supplementary Figure 1.** (A) Quantification of sperm motility after gibberellin exposure for 1, 5, 9 and 19 h. (B) Quantitative data on ROS levels after 1-h gibberellin treatment. (C) The quantitative data for apoptosis analysis. (D) The mitochondrial membrane potential ( $\Delta\Psi_m$ ) was measured by flow cytometry with the specific probe JC-1, but the results were not significant. The results are presented as the mean  $\pm$  SEM.
